# Supplementary material
Source: Elsevier journal article supplement (https://www.sciencedirect.com/science/article/pii/S2341192920301347)
Supplement: mmc1 [file S2341192920301347:mmc1.docx]

Figura 1

| Insuficiencia mitral funcional | Functional mitral regurgitation |
| --- | --- |
| Profundidad de coaptacion | Coaptation depth |
| Longitud de coaptacion | Coaptation length |
| Plano 4 camaras donde profundad copatacion es mayor | 4-chamber view where coaptation depth is greatest |
| Plano 4 camaras donde profundad copatacion es menor | 4-chamber view where coaptation depth is shallowest |
| Insuficiencia mitral degenerativa | Degenerative mitral regurgitation |
| Separacion velos | Flail |
| Anchura area flail | Flail width |
| Plano LAX, 4C, 5C donde separacion velos es mayor | LAX 4-C, 5-C view where flail is greatest |
| Plano transgastrico eje corto donde anchura area de flail es mayor | Transgastric short axis view where flail width is greatest |

Figura 15

Differential diagnosis in postcardiotomy shock

| New/Persistent segmental ventricular motility abnormalities | Ventricular dysfunction (LV, RV or biventricular) | *De novo* anatomical defect | Prosthetic valve  Valve repair |
| --- | --- | --- | --- |
|  |  |  |  |
| - Coronary spasm  - Air embolism  - Stenotic coronary anastomosis  - Mechanical obstruction of graft  - Coronary embolism due to calcium mobilisation | - Stunned myocardium  - Incomplete coronary bypass  - Poor myocardial protection | - Dynamic obstruction of the LV outflow tract  - Atrial/ventricular septal defect  - Iatrogenic dissection of ascending aorta | - Periprosthetic leakage  - Prosthetic malfunction causing leakage  - Significant regurgitation  - Mechanical obstruction of circumflex artery  - Coronary embolism due to calcium mobilisation |
